# Supplementary material for: Sound detection by the longfin squid (Loligo pealeii) studied with auditory evoked potentials: sensitivity to low-frequency particle motion and not pressure
Source: Oxford University Press journal article supplement (doi:10.1242/jeb.048348), 2010-10-15
Supplement: jeb048348stables1.pdf [file jeb048348stables1.pdf]

Table S1. Latency of AEP waves generated from the underwater speaker based upon frequency

| Frequency (Hz) | Mean latency | s.d. |
|----------------|--------------|------|
| 50             | 21.08        | 1.81 |
| 80             | 13.14        | 0.54 |
| 100            | 11.58        | 0.64 |
| 150            | 12.82        | 0.96 |
| 200            | 9.95         | 0.24 |
| 300            | 8.44         | 0.22 |

Latency was measured using six squid with clear AEP records at the highest respective stimulus levels. The time from stimulus onset to the minima of the first negative wave was noted as the onset latency. Standard deviations are also noted. Shorter onset latencies were generally associated with higher frequencies.
