# Supplementary figures and images for: Sound detection by the longfin squid (Loligo pealeii) studied with auditory evoked potentials: sensitivity to low-frequency particle motion and not pressure
Source: Oxford University Press journal article supplement (doi:10.1242/jeb.048348), 2010-10-15

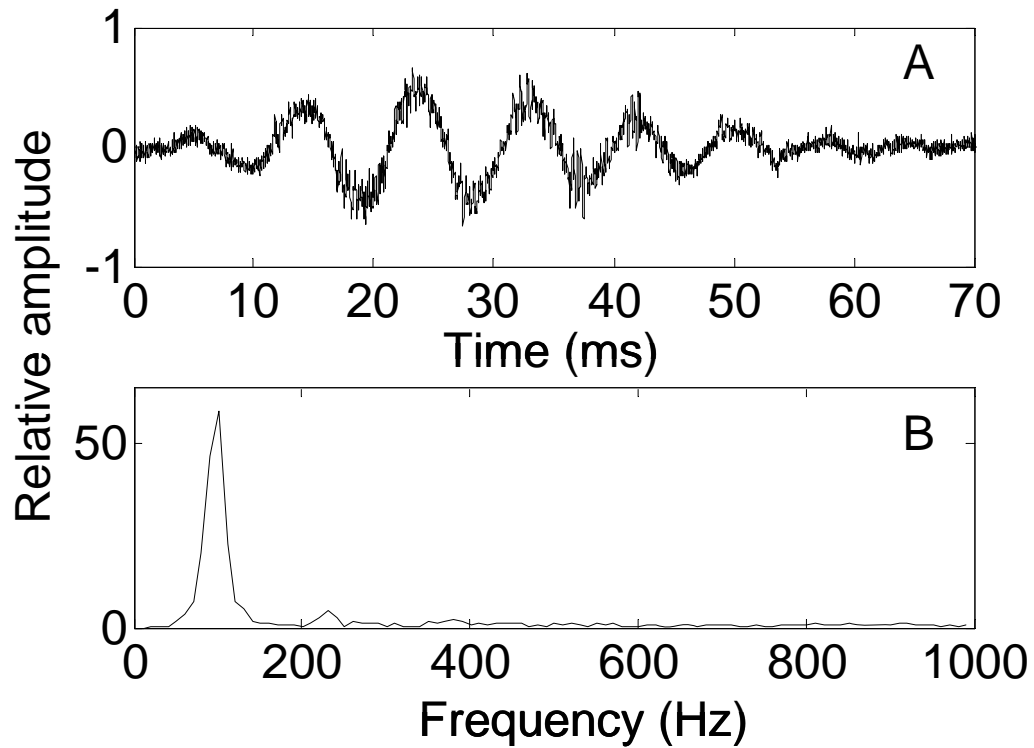

Supplement: jeb048348figs1.pdf [file jeb048348figs1.pdf]

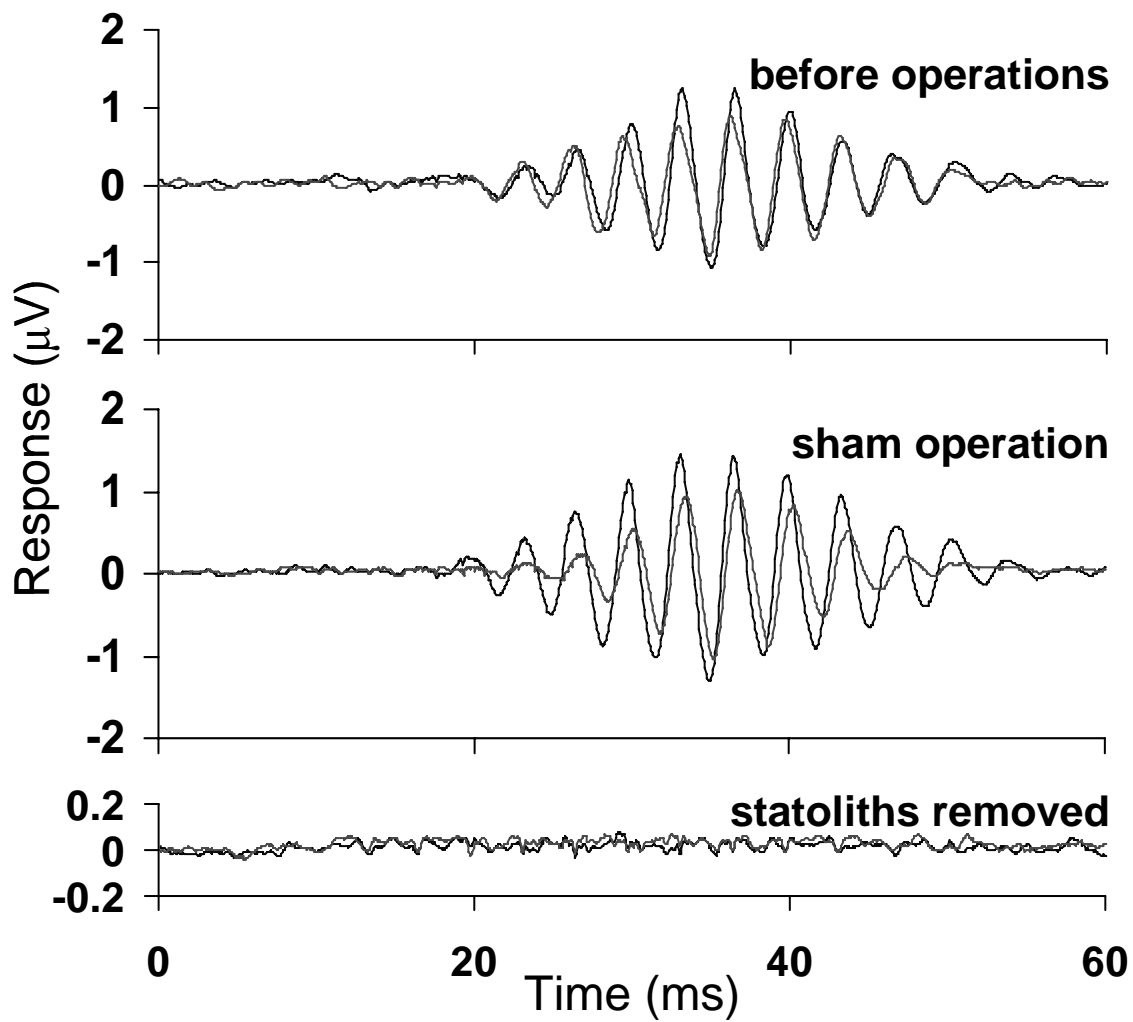

Supplement: jeb048348figs2.pdf [file jeb048348figs2.pdf]
